# Supplementary material for: Upfront Xpert MTB/RIF testing on various specimen types for presumptive infant TB cases for early and appropriate treatment initiation
Source: PLOS journal article supplement (doi:10.1371/journal.pone.0202085), 2018-08-30
Supplement: S2 (10.1371/journal.pone.0202085.s002) [file journal.pone.0202085.s002]

# RNTCP Request Form for examination of biological specimen for TB

(Required for Diagnosis of TB, Drug Sensitivity Testing and follow up)

## Patient Information

|                                         |  |                                                                                                                                                                                                                                                                                                                                                                                                                  |                                                                                           |
|-----------------------------------------|--|------------------------------------------------------------------------------------------------------------------------------------------------------------------------------------------------------------------------------------------------------------------------------------------------------------------------------------------------------------------------------------------------------------------|-------------------------------------------------------------------------------------------|
| Patient name                            |  | Age (in yrs): _____                                                                                                                                                                                                                                                                                                                                                                                              | Gender: <input type="checkbox"/> M <input type="checkbox"/> F <input type="checkbox"/> TG |
| Patient mobile no. or other contact no. |  | Specimen date of collection (DD/MM/YY) _____                                                                                                                                                                                                                                                                                                                                                                     | <input type="checkbox"/> Sputum<br><input type="checkbox"/> Other (specify) _____         |
| Aadhar no.                              |  | HIV Status: <input type="checkbox"/> Reactive <input type="checkbox"/> Non-Reactive <input type="checkbox"/> Unknown                                                                                                                                                                                                                                                                                             |                                                                                           |
| Patient address with landmark           |  | Key populations: <input type="checkbox"/> Contact of known TB Patient<br><input type="checkbox"/> Diabetes <input type="checkbox"/> Tobacco <input type="checkbox"/> Prison <input type="checkbox"/> Miner <input type="checkbox"/> Migrant<br><input type="checkbox"/> Refugee <input type="checkbox"/> Urban slum <input type="checkbox"/> Health-care worker<br><input type="checkbox"/> Other(specify) _____ |                                                                                           |

|                                                                                                                            |                                                                         |
|----------------------------------------------------------------------------------------------------------------------------|-------------------------------------------------------------------------|
| Name and Type of referring facility (PHI/DMC/TU/ DTC/ICTC/ART/Medical College/DR-TB Centre/Private Others, specify): _____ | CDL NIKSHAY ID: __ - __ - __ - <u>C</u> - __ - __ - __ - __             |
| Health Establishment ID (NIKSHAY): ____                                                                                    | RNTCP TB Reg No. _____<br>Or<br><input type="checkbox"/> Not Applicable |
| State: _____ District: _____ Tuberculosis Unit (TU): _____                                                                 |                                                                         |

## Reason for Testing:

## Diagnosis and follow up of TB

|                                                                                                                                                                          |                                                                                                                                    |
|--------------------------------------------------------------------------------------------------------------------------------------------------------------------------|------------------------------------------------------------------------------------------------------------------------------------|
| Diagnosis (NIKSHAY ID _____)                                                                                                                                             | Follow up (Smear and culture)                                                                                                      |
| H/O anti TB Rx for >1 month: <input type="checkbox"/> Yes <input type="checkbox"/> No                                                                                    | RNTCP TB Reg No _____                                                                                                              |
| <input type="checkbox"/> Presumptive TB<br><input type="checkbox"/> Repeat Exam<br><input type="checkbox"/> Private referral<br><input type="checkbox"/> Presumptive NTM | NIKSHAY ID: _____                                                                                                                  |
| Predominant symptom _____                                                                                                                                                | Regimen: <input type="checkbox"/> New <input type="checkbox"/> Previously Treated                                                  |
| Duration _____ days                                                                                                                                                      | Reason: <input type="checkbox"/> End IP <input type="checkbox"/> End CP                                                            |
|                                                                                                                                                                          | Post treatment: <input type="checkbox"/> 6m <input type="checkbox"/> 12m <input type="checkbox"/> 18m <input type="checkbox"/> 24m |

## Diagnosis and follow up Drug-resistant TB

|                                                                                                                                                                                                                                                                                                                                                                                                                                      |                                                                                                                                                                                                                                                                                                                                                                                                                                                                                                                                                                                                                                                                                                                                                                                        |
|--------------------------------------------------------------------------------------------------------------------------------------------------------------------------------------------------------------------------------------------------------------------------------------------------------------------------------------------------------------------------------------------------------------------------------------|----------------------------------------------------------------------------------------------------------------------------------------------------------------------------------------------------------------------------------------------------------------------------------------------------------------------------------------------------------------------------------------------------------------------------------------------------------------------------------------------------------------------------------------------------------------------------------------------------------------------------------------------------------------------------------------------------------------------------------------------------------------------------------------|
| Drug Susceptibility Testing (DST)                                                                                                                                                                                                                                                                                                                                                                                                    | Follow up (Culture)                                                                                                                                                                                                                                                                                                                                                                                                                                                                                                                                                                                                                                                                                                                                                                    |
| <input type="checkbox"/> New <input type="checkbox"/> Previously treated                                                                                                                                                                                                                                                                                                                                                             | PMDT TB No _____                                                                                                                                                                                                                                                                                                                                                                                                                                                                                                                                                                                                                                                                                                                                                                       |
| <input type="checkbox"/> At diagnosis<br><input type="checkbox"/> Contact of MDR/RR TB<br><input type="checkbox"/> Follow up Sm +ve<br><input type="checkbox"/> Private referral<br><input type="checkbox"/> Discordance resolution                                                                                                                                                                                                  | DR TB NIKSHAY ID: _____                                                                                                                                                                                                                                                                                                                                                                                                                                                                                                                                                                                                                                                                                                                                                                |
| <input type="checkbox"/> Presumptive H mono/poly                                                                                                                                                                                                                                                                                                                                                                                     | Regimen:                                                                                                                                                                                                                                                                                                                                                                                                                                                                                                                                                                                                                                                                                                                                                                               |
| <input type="checkbox"/> MDR/RR TB at Diagnosis<br><input type="checkbox"/> ≥ 4 months culture positive<br><input type="checkbox"/> 3 monthly for persistent culture positives (treatment month _____)<br><input type="checkbox"/> Culture reversion<br><input type="checkbox"/> Failure of MDR/RR-TB regimen<br><input type="checkbox"/> Recurrent case of second line treatment<br><input type="checkbox"/> Discordance resolution | <input type="checkbox"/> Regimen for INH mono/poly resistant TB<br><input type="checkbox"/> Regimen for MDR/RR TB<br><input type="checkbox"/> Shorter regimen*<br><input type="checkbox"/> Modified Regimen for MDR/RR-TB + FQ /SLI resistance<br><input type="checkbox"/> Regimen for XDR TB<br><input type="checkbox"/> Modified Regimen for mixed pattern resistance<br><input type="checkbox"/> Regimen with New Drug for MDR-TB Regimen + FQ/SLI resistance<br><input type="checkbox"/> Regimen with New Drug for XDR-TB<br><input type="checkbox"/> Regimen with New Drug for failures of regimen for MDR TB<br><input type="checkbox"/> Regimen with New Drug for failures of regimen for XDR-TB<br><input type="checkbox"/> Regimen with New Drug for mixed pattern resistance |
|                                                                                                                                                                                                                                                                                                                                                                                                                                      | Treatment <input type="checkbox"/> Month <input type="checkbox"/> Week : _____                                                                                                                                                                                                                                                                                                                                                                                                                                                                                                                                                                                                                                                                                                         |

## Test requested:

|                                                                                                                                                                                                                                                                                                                                                                                                                                                              |
|--------------------------------------------------------------------------------------------------------------------------------------------------------------------------------------------------------------------------------------------------------------------------------------------------------------------------------------------------------------------------------------------------------------------------------------------------------------|
| <input type="checkbox"/> Microscopy <input type="checkbox"/> TST <input type="checkbox"/> IGRA <input type="checkbox"/> Chest X-ray <input type="checkbox"/> Cytopathology <input type="checkbox"/> Histopathology <input type="checkbox"/> CBNAAT <input type="checkbox"/> Culture<br><input type="checkbox"/> DST <input type="checkbox"/> Line Probe Assay <input type="checkbox"/> Gene Sequencing <input type="checkbox"/> Other (Please Specify) _____ |
| Requestor Name, Designation and Signature: _____                                                                                                                                                                                                                                                                                                                                                                                                             |
| Contact Number: _____ Email ID: _____                                                                                                                                                                                                                                                                                                                                                                                                                        |

Results: NIKSHAY ID Generated: \_\_\_\_\_ CDL NIKSHAY ID: \_\_\_\_\_

## Microscopy (☐ ZN ☐ Florescent)

|          | Lab Sr. No | Visual appearance | Result   |        |    |    |    |
|----------|------------|-------------------|----------|--------|----|----|----|
|          |            |                   | Negative | Scanty | 1+ | 2+ | 3+ |
| Sample A |            |                   |          |        |    |    |    |
| Sample B |            |                   |          |        |    |    |    |

Date tested: \_\_\_\_\_ Date Reported: \_\_\_\_\_ Reported by: \_\_\_\_\_  
(Name and Signature)

## Cartridge Based Nucleic Acid Amplification Test (CBNAAT)

|                                                                                                                                               |                                                                                                                                                                                                                                                                                              |
|-----------------------------------------------------------------------------------------------------------------------------------------------|----------------------------------------------------------------------------------------------------------------------------------------------------------------------------------------------------------------------------------------------------------------------------------------------|
| <b>Sample</b>                                                                                                                                 | <input type="checkbox"/> A <span style="margin-left: 100px;"><input type="checkbox"/> B</span>                                                                                                                                                                                               |
| <b>M. Tuberculosis</b>                                                                                                                        | <input type="checkbox"/> Detected <span style="margin-left: 100px;"><input type="checkbox"/> Not Detected</span> <span style="margin-left: 100px;"><input type="checkbox"/> N/A</span>                                                                                                       |
| <b>Rif Resistance</b>                                                                                                                         | <input type="checkbox"/> Detected <span style="margin-left: 100px;"><input type="checkbox"/> Not Detected</span> <span style="margin-left: 100px;"><input type="checkbox"/> Indeterminate</span> <span style="margin-left: 100px;"><input type="checkbox"/> N/A</span>                       |
| <b>Test</b>                                                                                                                                   | <input type="checkbox"/> No Result <span style="margin-left: 50px;"><input type="checkbox"/> Invalid</span> <span style="margin-left: 50px;"><input type="checkbox"/> Error – Error Code _____</span> <span style="float: right; font-size: small;">(Please arrange for fresh sample)</span> |
| <b>Date tested:</b> _____ <b>Date Reported:</b> _____ <b>Reported by:</b> _____<br><div style="text-align: right;">(Name and Signature)</div> |                                                                                                                                                                                                                                                                                              |

## Culture (☐ LJ ☐ LC)

|                                                                                                                                               |                 |                 |                            |                      |
|-----------------------------------------------------------------------------------------------------------------------------------------------|-----------------|-----------------|----------------------------|----------------------|
| <b>Lab Sr. No</b>                                                                                                                             | <b>Negative</b> | <b>Positive</b> | <b>NTM (write species)</b> | <b>Contamination</b> |
|                                                                                                                                               |                 |                 |                            |                      |
| <b>Date Result:</b> _____ <b>Date Reported:</b> _____ <b>Reported by:</b> _____<br><div style="text-align: right;">(Name and Signature)</div> |                 |                 |                            |                      |

## Line Probe Assay (LPA)

☐ Direct ☐ Indirect    Lab serial \_\_\_\_\_

### First line LPA

**RpoB: ---- locus control:** ☐ present ☐ absent

**WT1:** ☐ present ☐ absent    **WT2:** ☐ present ☐ absent    **WT3:** ☐ present ☐ absent    **WT4:** ☐ present ☐ absent

**WT5:** ☐ present ☐ absent    **WT6:** ☐ present ☐ absent    **WT7:** ☐ present ☐ absent    **WT8:** ☐ present ☐ absent

**MUT1 (D516V):** ☐ present ☐ absent    **MUT2A (H526Y):** ☐ present ☐ absent    **MUT2B (H526D):** ☐ present ☐ absent    **MUT3 (S531L):** ☐ present ☐ absent

|                                                                                                                                                                                                                                                                                                                                                                                                  |                                                                                                                                                                                                                                                                                                                                                                                                                                                                                                                                                                                                                                                                       |
|--------------------------------------------------------------------------------------------------------------------------------------------------------------------------------------------------------------------------------------------------------------------------------------------------------------------------------------------------------------------------------------------------|-----------------------------------------------------------------------------------------------------------------------------------------------------------------------------------------------------------------------------------------------------------------------------------------------------------------------------------------------------------------------------------------------------------------------------------------------------------------------------------------------------------------------------------------------------------------------------------------------------------------------------------------------------------------------|
| <p><b>Kat G: ----- locus control:</b> <input type="checkbox"/> present <input type="checkbox"/> absent</p> <p><b>WT1 (315):</b> <input type="checkbox"/> present <input type="checkbox"/> absent</p> <p><b>MUT1 (S315T1):</b> <input type="checkbox"/> present <input type="checkbox"/> absent</p> <p><b>MUT2 (S315T2):</b> <input type="checkbox"/> present <input type="checkbox"/> absent</p> | <p><b>Inh A:----- locus control:</b> <input type="checkbox"/> present <input type="checkbox"/> absent</p> <p><b>WT1 (-15, -16):</b> <input type="checkbox"/> present <input type="checkbox"/> absent    <b>WT2 (-8):</b> <input type="checkbox"/> present <input type="checkbox"/> absent</p> <p><b>MUT1 (C15T):</b> <input type="checkbox"/> present <input type="checkbox"/> absent    <b>MUT2 (A16G):</b> <input type="checkbox"/> present <input type="checkbox"/> absent</p> <p><b>MUT3A (T8C):</b> <input type="checkbox"/> present <input type="checkbox"/> absent    <b>MUT3B (T8A):</b> <input type="checkbox"/> present <input type="checkbox"/> absent</p> |
|--------------------------------------------------------------------------------------------------------------------------------------------------------------------------------------------------------------------------------------------------------------------------------------------------------------------------------------------------------------------------------------------------|-----------------------------------------------------------------------------------------------------------------------------------------------------------------------------------------------------------------------------------------------------------------------------------------------------------------------------------------------------------------------------------------------------------------------------------------------------------------------------------------------------------------------------------------------------------------------------------------------------------------------------------------------------------------------|

### Second line LPA

|                                                                                                                                                                                                                                                                                                                                                                                                                                                                                                                                                                                                                                                                                                                                                                                                                                                                                                                                                                                       |                                                                                                                                                                                                                                                                                                                                                                                                               |                                                                                                                                                                                                                                                                                                                                                                                                                                                                                                            |                                                                                                                                                                                                                                                                                                                                                                                                                                                                                                      |
|---------------------------------------------------------------------------------------------------------------------------------------------------------------------------------------------------------------------------------------------------------------------------------------------------------------------------------------------------------------------------------------------------------------------------------------------------------------------------------------------------------------------------------------------------------------------------------------------------------------------------------------------------------------------------------------------------------------------------------------------------------------------------------------------------------------------------------------------------------------------------------------------------------------------------------------------------------------------------------------|---------------------------------------------------------------------------------------------------------------------------------------------------------------------------------------------------------------------------------------------------------------------------------------------------------------------------------------------------------------------------------------------------------------|------------------------------------------------------------------------------------------------------------------------------------------------------------------------------------------------------------------------------------------------------------------------------------------------------------------------------------------------------------------------------------------------------------------------------------------------------------------------------------------------------------|------------------------------------------------------------------------------------------------------------------------------------------------------------------------------------------------------------------------------------------------------------------------------------------------------------------------------------------------------------------------------------------------------------------------------------------------------------------------------------------------------|
| <p><b>gyrA:--</b></p> <p><b>locus control:</b> <input type="checkbox"/> present <input type="checkbox"/> absent</p> <p><b>WT1 (85-90):</b> <input type="checkbox"/> present <input type="checkbox"/> absent</p> <p><b>WT2 (89-93):</b> <input type="checkbox"/> present <input type="checkbox"/> absent</p> <p><b>WT3 (92-97):</b> <input type="checkbox"/> present <input type="checkbox"/> absent</p> <p><b>MUT1 (A90V):</b> <input type="checkbox"/> present <input type="checkbox"/> absent</p> <p><b>MUT2 (S91P):</b> <input type="checkbox"/> present <input type="checkbox"/> absent</p> <p><b>MUT3A (D94A):</b> <input type="checkbox"/> present <input type="checkbox"/> absent</p> <p><b>MUT3B (D94N/Y):</b> <input type="checkbox"/> present <input type="checkbox"/> absent</p> <p><b>MUT3C (D94G):</b> <input type="checkbox"/> present <input type="checkbox"/> absent</p> <p><b>MUT3D (D94H):</b> <input type="checkbox"/> present <input type="checkbox"/> absent</p> | <p><b>gyrB:----</b></p> <p><b>locus control:</b> <input type="checkbox"/> present <input type="checkbox"/> absent</p> <p><b>WT1 (536-541):</b> <input type="checkbox"/> present <input type="checkbox"/> absent</p> <p><b>MUT1 (N538D):</b> <input type="checkbox"/> present <input type="checkbox"/> absent</p> <p><b>MUT2 (E540V):</b> <input type="checkbox"/> present <input type="checkbox"/> absent</p> | <p><b>rrs:-----</b></p> <p><b>locus control:</b> <input type="checkbox"/> present <input type="checkbox"/> absent</p> <p><b>WT1 (1401-02):</b> <input type="checkbox"/> present <input type="checkbox"/> absent</p> <p><b>WT2 (1484):</b> <input type="checkbox"/> present <input type="checkbox"/> absent</p> <p><b>MUT1 (A1401G):</b> <input type="checkbox"/> present <input type="checkbox"/> absent</p> <p><b>MUT2 (G1484T):</b> <input type="checkbox"/> present <input type="checkbox"/> absent</p> | <p><b>eis:-----</b></p> <p><b>locus control:</b> <input type="checkbox"/> present <input type="checkbox"/> absent</p> <p><b>WT1 (37):</b> <input type="checkbox"/> present <input type="checkbox"/> absent</p> <p><b>WT2 (14, 12, 10):</b> <input type="checkbox"/> present <input type="checkbox"/> absent</p> <p><b>WT3 (2):</b> <input type="checkbox"/> present <input type="checkbox"/> absent</p> <p><b>MUT1 (C-14T):</b> <input type="checkbox"/> present <input type="checkbox"/> absent</p> |
|---------------------------------------------------------------------------------------------------------------------------------------------------------------------------------------------------------------------------------------------------------------------------------------------------------------------------------------------------------------------------------------------------------------------------------------------------------------------------------------------------------------------------------------------------------------------------------------------------------------------------------------------------------------------------------------------------------------------------------------------------------------------------------------------------------------------------------------------------------------------------------------------------------------------------------------------------------------------------------------|---------------------------------------------------------------------------------------------------------------------------------------------------------------------------------------------------------------------------------------------------------------------------------------------------------------------------------------------------------------------------------------------------------------|------------------------------------------------------------------------------------------------------------------------------------------------------------------------------------------------------------------------------------------------------------------------------------------------------------------------------------------------------------------------------------------------------------------------------------------------------------------------------------------------------------|------------------------------------------------------------------------------------------------------------------------------------------------------------------------------------------------------------------------------------------------------------------------------------------------------------------------------------------------------------------------------------------------------------------------------------------------------------------------------------------------------|

### Final LPA Interpretation: ---

|                                                                                                                                                                                                                                                                                                                                                                                                          |                                                                                                                                                                                                                                                                                                |
|----------------------------------------------------------------------------------------------------------------------------------------------------------------------------------------------------------------------------------------------------------------------------------------------------------------------------------------------------------------------------------------------------------|------------------------------------------------------------------------------------------------------------------------------------------------------------------------------------------------------------------------------------------------------------------------------------------------|
| <p><b>MTB result</b>    <input type="checkbox"/> MTB positive    <input type="checkbox"/> MTB Negative</p> <p><b>RIF</b>            <input type="checkbox"/> Sensitive    <input type="checkbox"/> Resistant    <input type="checkbox"/> Indeterminate</p> <p><b>Quinolone</b>    <input type="checkbox"/> Sensitive    <input type="checkbox"/> Resistant    <input type="checkbox"/> Indeterminate</p> | <p><b>INH</b>            <input type="checkbox"/> Sensitive    <input type="checkbox"/> Resistant    <input type="checkbox"/> Indeterminate</p> <p><b>SLID</b>          <input type="checkbox"/> Sensitive    <input type="checkbox"/> Resistant    <input type="checkbox"/> Indeterminate</p> |
|----------------------------------------------------------------------------------------------------------------------------------------------------------------------------------------------------------------------------------------------------------------------------------------------------------------------------------------------------------------------------------------------------------|------------------------------------------------------------------------------------------------------------------------------------------------------------------------------------------------------------------------------------------------------------------------------------------------|

**Date Result:** \_\_\_\_\_ **Date Reported:** \_\_\_\_\_ **Reported by:** \_\_\_\_\_  

(Name and Signature)

## Drug Susceptibility Test (DST) results

| Lab Sr.No | 1 <sup>st</sup> line drugs |   |        |   |        |   | SLI |   |    | FQ |    |     | Other     |         |     |     |     |     |     |     |  |  |  |  |  |
|-----------|----------------------------|---|--------|---|--------|---|-----|---|----|----|----|-----|-----------|---------|-----|-----|-----|-----|-----|-----|--|--|--|--|--|
|           | R                          | H | (inhA) | H | (katG) | S | E   | Z | Km | Cm | Am | Lfx | Mfx (0.5) | Mfx (2) | Eto | PAS | Lzd | Cfz | Clr | Azi |  |  |  |  |  |
|           |                            |   |        |   |        |   |     |   |    |    |    |     |           |         |     |     |     |     |     |     |  |  |  |  |  |

**Date Result:** \_\_\_\_\_ **Date Reported:** \_\_\_\_\_ **Reported by:** \_\_\_\_\_  
*R: Resistant; S: Susceptible; C: Contaminated; -- Not done* (Name and Signature)

## Other tests for TB diagnosis

|                                                                                                                     |
|---------------------------------------------------------------------------------------------------------------------|
| <b>Test (Please Specify):</b> _____                                                                                 |
| <b>Result:</b> _____                                                                                                |
| <b>Date reported:</b> _____ <b>Reported by:</b> _____<br><div style="text-align: right;">(Name and Signature)</div> |
